# Supplementary material for: Multi-arm carriers composed of an antioxidant lignin core and poly(glycidyl methacrylate-co-poly(ethylene glycol)methacrylate) derivative arms for highly efficient gene delivery
Source: Royal Society of Chemistry journal article supplement (doi:10.1039/c5tb01202c), 2015-01-01
Supplement: c5tb01202c1.pdf [file c5tb01202c1.pdf]

**Multi-arm carriers composed of antioxidant lignin core and poly(glycidyl methacrylate-co-poly(ethylene glycol) methacrylate) derivative arms for highly efficient gene delivery**

Shan Jiang,<sup>\*a,b</sup> Dan Kai,<sup>a</sup> Qing Qing Dou<sup>a</sup> and Xian Jun Loh<sup>\*a,c,d</sup>

<sup>a</sup> Institute of Materials Research and Engineering, A\*STAR (Agency for Science, Technology and Research), 3 Research Link, Singapore 117602.

<sup>b</sup> College of Chemistry, Jilin University, Changchun, P. R. China 130012

<sup>c</sup> Department of Materials Science and Engineering, National University of Singapore, 9 Engineering Drive 1, Singapore 117576

<sup>d</sup> Singapore Eye Research Institute, 11 Third Hospital Avenue, Singapore 168751

E-mail: sjiang@jlu.edu.cn, lohxj@imre.a-star.edu.sg

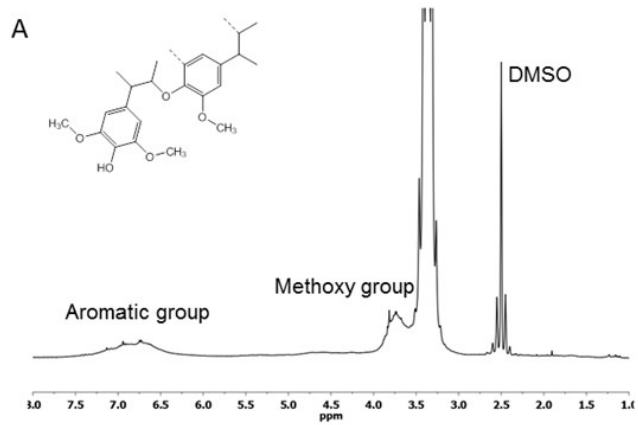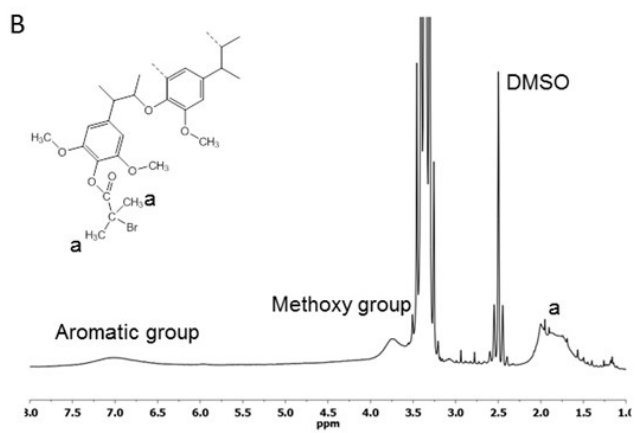

**Figure S1.**  $^1\text{H}$  NMR (400 MHz) spectra of (A) lignin and (B) lignin-Br in  $\text{DMSO-}d_6$ .

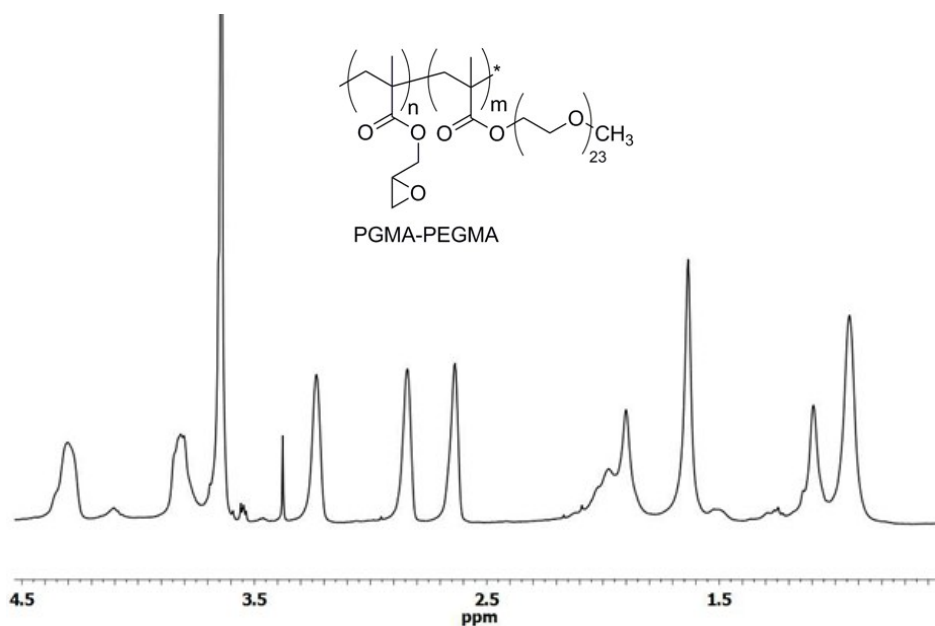

**Figure S2.**  $^1\text{H}$  NMR (400 MHz) spectra of PGMA-PEGMA in chloroform *d*.

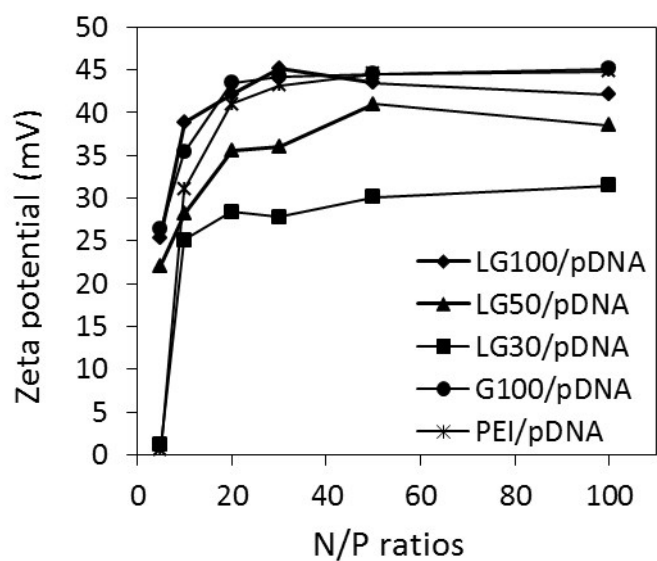

**Figure S3.** Zeta potential of the complexes between the cationic polymers (LG100, LG50, LG30, G100, and PEI) and pDNA at various N/P ratios.
